# Supplementary material
Source: PubMed Central journal article supplement (PMC3437547)
Supplement: NIHMS398298-supplement-Supplementary_Fig1.pdf [file NIHMS398298-supplement-Supplementary_Fig1.pdf]

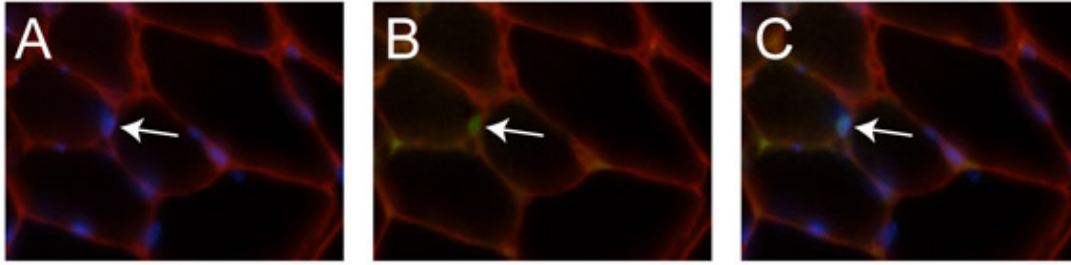

**Fig. S1.** Endogenous satellite cells are Pax7 positive. Tibialis anterior muscles of mice were fixed, frozen, sectioned and stained for endogenous satellite cells. (A) Laminin (red) and DAPI staining (blue) show muscle fiber boundaries and myonuclei. (B) A Pax7-positive satellite cell (green, arrow) is shown to reside within the laminin stain. (C) Pax7 and DAPI staining colocalize in the same nucleus.
